# Supplementary material for: Synthesis, Characterization, and Cytotoxicity Studies of N-(4-Methoxybenzyl) Thiosemicarbazone Derivatives and Their Ruthenium(II)-p-cymene Complexes
Source: MDPI journal article supplement (doi:10.3390/molecules27227976), 2022-11-17
Supplement: s1 [file s1]

# **Synthesis, Characterization, and Cytotoxic Studies of N-(4-methoxybenzyl) Thiosemicarbazone Derivatives and Their Ruthenium(II)-p-cymene complexes**

Mónica Martínez-Estévez<sup>[a]</sup>, Soledad García-Fontán<sup>[a],[b],\*</sup>, Saray Argibay-Otero<sup>[a],[b]</sup>, Inmaculada Prieto<sup>[b],[c]</sup>, Ezequiel M. Vázquez-López<sup>[a],[b],\*</sup>

<sup>[a]</sup> Departamento de Química Inorgánica, Universidade de Vigo, Campus Universitario, E-36310 Vigo, Galicia – Spain.

<sup>[b]</sup> Metallosupramolecular Chemistry Group Galicia South Health Research Institute (IIS Galicia Sur) SERGAS-UVIGO. Galicia – Spain.

<sup>[c]</sup> Departamento de Química Física, Universidade de Vigo, Campus Universitario, E-36310 Vigo, Galicia – Spain.

\* Corresponding authors: S.G.F, e-mail: [sgarcia@uvigo.gal](mailto:sgarcia@uvigo.gal)

E.M.V.L, e-mail: [ezequiel@uvigo.gal](mailto:ezequiel@uvigo.gal)

***Supplementary Material***

## Contents:

|                                                                                                                                                            |    |
|------------------------------------------------------------------------------------------------------------------------------------------------------------|----|
| Crystal data.....                                                                                                                                          | 4  |
| Table S1. Crystal data and structure refinement. ....                                                                                                      | 4  |
| Table S2. Selected bond lengths (Å) and angles (°) for all the compounds studied in this paper .....                                                       | 6  |
| Table S3. Main intermolecular interactions observed in the crystal structures (Å and °). ....                                                              | 8  |
| <sup>1</sup> H-NMR spectra.....                                                                                                                            | 10 |
| Figure S1: <sup>1</sup> H NMR spectrum of ligand HL <sup>1</sup> .....                                                                                     | 10 |
| Figure S2: <sup>1</sup> H NMR spectrum of ligand HL <sup>2</sup> .....                                                                                     | 10 |
| Figure S3: <sup>1</sup> H NMR spectrum of complex 1(TfO).....                                                                                              | 11 |
| Figure S4: <sup>1</sup> H NMR spectrum of complex 2(TfO).....                                                                                              | 11 |
| <sup>13</sup> C-NMR spectra.....                                                                                                                           | 12 |
| Figure S5: <sup>13</sup> C NMR spectrum of ligand HL <sup>1</sup> .....                                                                                    | 12 |
| Figure S6: <sup>13</sup> C NMR spectrum of ligand HL <sup>2</sup> .....                                                                                    | 12 |
| NOESY spectra.....                                                                                                                                         | 13 |
| Figure S7: NOESY spectrum of complex 1(OTf).....                                                                                                           | 13 |
| Figure S8: NOESY spectrum of complex 2(OTf).....                                                                                                           | 13 |
| ESI-Mass spectra .....                                                                                                                                     | 14 |
| Figure S9: ESI Mass spectra of ligand HL <sup>1</sup> .....                                                                                                | 14 |
| Figure S10: ESI Mass spectra of ligand HL <sup>2</sup> .....                                                                                               | 14 |
| Figure S11: ESI Mass spectra of complex 1(TfO).....                                                                                                        | 15 |
| Figure S12: ESI Mass spectra of complex 2(TfO).....                                                                                                        | 15 |
| Infrared spectra.....                                                                                                                                      | 16 |
| Figure S13: IR spectrum of ligand HL <sup>1</sup> .....                                                                                                    | 16 |
| Figure S14: IR spectrum of ligand HL <sup>2</sup> .....                                                                                                    | 16 |
| Figure S15: IR spectrum of complex 1(TfO).....                                                                                                             | 16 |
| Figure S16: IR spectrum of complex 2(TfO).....                                                                                                             | 16 |
| Cyclic voltammetry.....                                                                                                                                    | 17 |
| Figure S17: Cyclic voltammetry (CV) and square wave voltammetry (SWV) data of complex 1(TfO) .....                                                         | 17 |
| Figure S18: Cyclic voltammetry (CV) and square wave voltammetry (SWV) data of complex 2(TfO) .....                                                         | 17 |
| Figure S19: X: I <sub>pa</sub> (●) and I <sub>pc</sub> (▪) of redox waves for complexes 1(TfO) (top) and 2(TfO) (bottom) vs square root of scan rate. .... | 18 |



## Crystal data

Table S1. Crystal data and structure refinement.

| Compound                                    | HL <sup>1</sup>                                                 | HL <sup>2</sup>                                                  | <b>1(Cl)</b> ·(CH <sub>3</sub> OH)                                                |
|---------------------------------------------|-----------------------------------------------------------------|------------------------------------------------------------------|-----------------------------------------------------------------------------------|
| CSD deposition number                       | 2216181                                                         | 2216182                                                          | 2216183                                                                           |
| Empirical formula                           | C <sub>18</sub> H <sub>20</sub> N <sub>3</sub> O <sub>3</sub> S | C <sub>16</sub> H <sub>16</sub> FN <sub>3</sub> O <sub>2</sub> S | C <sub>29</sub> H <sub>39</sub> Cl <sub>2</sub> N <sub>3</sub> O <sub>4</sub> RuS |
| Formula weight                              | 358.43                                                          | 333.38                                                           | 697.66                                                                            |
| Temperature (K)                             | 100(2)                                                          | 100(2)                                                           | 100(2)                                                                            |
| Wavelength (Å)                              | 0.71073                                                         | 0.71073                                                          | 0.71073                                                                           |
| Crystal system                              | Monoclinic                                                      | Triclinic                                                        | Monoclinic                                                                        |
| Space group                                 | P 2 <sub>1</sub> /c                                             | P -1                                                             | P 2 <sub>1</sub> /n                                                               |
| Unit cell dimensions                        |                                                                 |                                                                  |                                                                                   |
| a(Å)                                        | 5.1245(2)                                                       | 9.298(3)                                                         | 13.1447(9)                                                                        |
| b(Å)                                        | 34.1354(13)                                                     | 9.575(3)                                                         | 10.2221(6)                                                                        |
| c(Å)                                        | 9.8803(4)                                                       | 17.659(5)                                                        | 22.8513(16)                                                                       |
| α(°)                                        | 90                                                              | 96.942(10)                                                       | 90                                                                                |
| β(°)                                        | 95.0150(10)                                                     | 90.667(10)                                                       | 99.019(2)                                                                         |
| γ(°)                                        | 90                                                              | 97.968(10)                                                       | 90                                                                                |
| Volume (Å <sup>3</sup> )                    | 1721.71(12)                                                     | 1544.9(8)                                                        | 3032.5(3)                                                                         |
| Z                                           | 4                                                               | 4                                                                | 4                                                                                 |
| ρ <sub>c</sub> (Mg/m <sup>3</sup> )         | 1.383                                                           | 1.433                                                            | 1.528                                                                             |
| μ(mm <sup>-1</sup> )                        | 0.211                                                           | 0.233                                                            | 0.801                                                                             |
| θ range (°)                                 | 2.39 - 28.30°                                                   | 2.16 to 25.89                                                    | 1.92 - 28.32                                                                      |
| Index ranges (h;k;l)                        | -6,6; -45,45; -11,13                                            | 11,11; -11,11; -21,21                                            | -17,17; -13,13; -30,30                                                            |
| Reflections collected                       | 39775                                                           | 43317                                                            | 55640                                                                             |
| Independent reflections (R <sub>int</sub> ) | 4265 (0.0196)                                                   | 5754 (0.1189)                                                    | 7560 (0.0364)                                                                     |
| Goodness-of-fit on F <sup>2</sup>           | 1.049                                                           | 1.155                                                            | 1.047                                                                             |
| Final R1/wR2 [I>2σ(I)]                      | 0.0396/0.1097                                                   | 0.0859/0.1686                                                    | 0.0252/0.0624                                                                     |
| R1/wR2 (all data)                           | 0.0406/0.1107                                                   | 0.11870.1854                                                     | 0.0292/0.0645                                                                     |
| Diff. peak and hole (e Å <sup>-3</sup> )    | 0.873, -0.766                                                   | 0.660, -0.432                                                    | 0.906/-0.654                                                                      |

Table S1. (cont.)

| Compound                                    | <b>1(Cl)</b> . <sup>4</sup> / <sub>3</sub> H <sub>2</sub> O                          | <b>1(Tfo)</b> .2(CH <sub>3</sub> OH)                                                            | <b>2'(Tfo)</b>                                                                                               |
|---------------------------------------------|--------------------------------------------------------------------------------------|-------------------------------------------------------------------------------------------------|--------------------------------------------------------------------------------------------------------------|
| CSD deposition number                       | 2216184                                                                              | 2216185                                                                                         | 2216186                                                                                                      |
| Empirical formula                           | C <sub>28</sub> H <sub>38</sub> Cl <sub>2</sub> N <sub>3</sub> O <sub>4.33</sub> RuS | C <sub>31</sub> H <sub>43</sub> ClF <sub>3</sub> N <sub>3</sub> O <sub>8</sub> RuS <sub>2</sub> | C <sub>54</sub> H <sub>58</sub> F <sub>8</sub> N <sub>6</sub> O <sub>10</sub> Ru <sub>2</sub> S <sub>4</sub> |
| Formula weight                              | 6100(2)89.98                                                                         | 843.32                                                                                          | 1433,44                                                                                                      |
| Temperature (K)                             | 100(2)                                                                               | 100(2)                                                                                          | 292(2)                                                                                                       |
| Wavelength                                  | 0.71073                                                                              | 0.71073 Å                                                                                       | 0.71073 Å                                                                                                    |
| Crystal system                              | Trigonal                                                                             | Triclinic                                                                                       | Triclinic                                                                                                    |
| Space group                                 | R-3                                                                                  | P -1                                                                                            | P -1                                                                                                         |
| a(Å)                                        | 40.755(2)                                                                            | 12.4823(9)                                                                                      | 9.9016(3)                                                                                                    |
| b(Å)                                        | 40.755(2)                                                                            | 16.6642(12)                                                                                     | 12.4709(4)                                                                                                   |
| c(Å)                                        | 10.0513(8)                                                                           | 18.6059(14)                                                                                     | 13.2967(4)                                                                                                   |
| α(°)                                        | 90                                                                                   | 92.560(3)                                                                                       | 107.2590(10)                                                                                                 |
| β(°)                                        | 90                                                                                   | 90.174(3)                                                                                       | 91.1350(10)                                                                                                  |
| γ(°)                                        | 120                                                                                  | 111.434(2)                                                                                      | 109.7010(10)                                                                                                 |
| Volume (Å <sup>3</sup> )                    | 14458.2(18)                                                                          | 3598.1(5)                                                                                       | 1463.02(8)                                                                                                   |
| Z                                           | 18                                                                                   | 4                                                                                               | 1                                                                                                            |
| ρ <sub>c</sub> (Mg/m <sup>3</sup> )         | 1.426                                                                                | 1.557                                                                                           | 1.627                                                                                                        |
| μ(mm <sup>-1</sup> )                        | 0.756                                                                                | 0.694                                                                                           | 0.746                                                                                                        |
| θ range (°)                                 | 2.332 - 28.298                                                                       | 2.04 to 28.39                                                                                   | 1.83 to 28.31                                                                                                |
| Index ranges (h;k;l)                        | -54,52; -42,54, -13,13                                                               | -16,16; -22,22; -23,24                                                                          | -13,13; -16,16; -17,17                                                                                       |
| Reflections collected                       | 83112                                                                                | 72492                                                                                           | 73493                                                                                                        |
| Independent reflections (R <sub>int</sub> ) | 7989 (0.0680)                                                                        | 17900 (0.0365)                                                                                  | 7278 (0.0328)                                                                                                |
| Goodness-of-fit on F <sup>2</sup>           | 1.051                                                                                | 1.226                                                                                           | 1.050                                                                                                        |
| Final R1/wR2 [I>2σ(I)]                      | 0.0393/0.0888                                                                        | 0.0781/0.1667                                                                                   | 0.0536/0.1389                                                                                                |
| R1/wR2 (all data)                           | 0.0586/0.0996                                                                        | 0.0837/0.1690                                                                                   | 0.0609/0.1460                                                                                                |
| Diff. peak and hole (e Å <sup>3</sup> )     | 0.794/-0.764                                                                         | 3.497/-2.428                                                                                    | 0.983/-1.261                                                                                                 |

Table S2. Selected bond lengths (Å) and angles (°) for all the compounds studied in this paper.

|                            | HL <sup>1</sup> | 1(Cl).CH <sub>3</sub> OH | 1(Cl). <sup>4</sup> / <sub>3</sub> H <sub>2</sub> O | 1(TfO).2(CH <sub>3</sub> OH) |            |
|----------------------------|-----------------|--------------------------|-----------------------------------------------------|------------------------------|------------|
|                            |                 |                          |                                                     | A                            | B          |
| X =                        |                 | Cl(1)                    | Cl(1)                                               | Cl(1)                        | Cl(2)      |
| Ru(1)-N(3)                 |                 | 2.1638(13)               | 2.139(2)                                            | 2.127(4)                     | 2.126(4)   |
| Ru(1)-S(1)                 |                 | 2.3464(4)                | 2.3422(8)                                           | 2.3744(13)                   | 2.3767(13) |
| Ru(1)-X                    |                 | 2.4238(4)                | 2.4278(7)                                           | 2.3997(14)                   | 2.4015(14) |
| Ru(1)-Cc <sup>b</sup>      |                 | 1.6913(2)                | 1.7200(2)                                           | 1.6965(4)                    | 1.6907(4)  |
| Ru(1)-Cm <sup>c</sup>      |                 | 2.208(1)                 | 2.198(1)                                            | 2.208(2)                     | 2.206(2)   |
| S(1)-C(1)                  | 1.6897(13)      | 1.6970(16)               | 1.695(3)                                            | 1.698(5)                     | 1.701(5)   |
| N(2)-C(1)                  | 1.3628(16)      | 1.349(2)                 | 1.339(4)                                            | 1.348(6)                     | 1.333(6)   |
| N(2)-N(3)                  | 1.3934(14)      | 1.3960(18)               | 1.404(3)                                            | 1.387(6)                     | 1.413(6)   |
| N(3)-C(2)                  | 1.2909(16)      | 1.303(2)                 | 1.293(4)                                            | 1.304(6)                     | 1.293(6)   |
| C(1)-N(1)                  | 1.3326(16)      | 1.332(2)                 | 1.334(4)                                            | 1.329(7)                     | 1.339(7)   |
| N(1)-C(11)                 | 1.4520(16)      | 1.454(2)                 | 1.451(4)                                            | 1.478(7)                     | 1.468(7)   |
|                            |                 |                          |                                                     |                              |            |
| N(3)-Ru(1)-S(1)            |                 | 82.30(4)                 | 82.45(6)                                            | 80.99(12)                    | 81.09(12)  |
| N(3)-Ru(1)-X               |                 | 87.06(4)                 | 86.54(6)                                            | 84.63(12)                    | 84.65(12)  |
| S(1)-Ru(1)-X               |                 | 87.307(15)               | 87.13(3)                                            | 88.75(5)                     | 88.80(5)   |
| S(1)-Ru(1)-Cc <sup>b</sup> |                 | 125.504(12)              | 124.98(2)                                           | 126.86(4)                    | 127.03(4)  |
| N(3)-Ru(1)-Cc <sup>b</sup> |                 | 132.05(4)                | 133.64(7)                                           | 132.57(11)                   | 132.60(12) |
| X-Ru(1)-Cc <sup>b</sup>    |                 | 127.322(11)              | 126.61(2)                                           | 127.24(4)                    | 126.95(4)  |
| C(2)-N(3)-Ru(1)            |                 | 129.91(11)               | 130.6(2)                                            | 130.7(4)                     | 132.1(4)   |
| N(2)-N(3)-Ru(1)            |                 | 114.87(9)                | 114.95(18)                                          | 114.4(3)                     | 114.1(3)   |
| C(1)-S(1)-Ru(1)            |                 | 99.90(6)                 | 99.44(10)                                           | 98.77(18)                    | 98.72(18)  |
| C(2)-N(3)-N(2)             | 116.67(11)      | 114.81(13)               | 114.1(2)                                            | 120.8(4)                     | 120.4(4)   |
| N(3)-C(2)-C(3)             | 115.67(11)      | 119.63(14)               | 120.7(3)                                            | 122.5(5)                     | 123.3(5)   |
| N(1)-C(1)-N(2)             | 116.15(11)      | 116.04(14)               | 116.1(3)                                            | 115.8(5)                     | 116.1(5)   |
| N(1)-C(1)-S(1)             | 124.78(10)      | 121.15(12)               | 122.5(3)                                            | 124.3(4)                     | 123.4(4)   |
| N(2)-C(1)-S(1)             | 119.06(9)       | 122.81(13)               | 121.4(2)                                            | 119.9(4)                     | 120.5(4)   |

a) The data are the average of those observed in the two molecules present in the asymmetric unit.

b) Centroid defined for the averages of the six-membered ring of p-cymene ligand.

c) Average distance of the six Ru-C of p-cymene ligand.

d) Symmetry transformations used to generate equivalent atoms: -x+1,-y+1,-z

Table 2. (cont.)

|                            | HL <sup>2</sup>       | 2'(TfO)           |
|----------------------------|-----------------------|-------------------|
| X =                        |                       | S(1) <sup>d</sup> |
| Ru(1)-N(3)                 |                       | 2.104(3)          |
| Ru(1)-S(1)                 |                       | 2.3617(10)        |
| Ru(1)-X                    |                       | 2.4085(9)         |
| Ru(1)-Cc <sup>b</sup>      |                       | 1.4728(3)         |
| Ru(1)-Cm <sup>c</sup>      |                       | 2.215(2)          |
| S(1)-C(1)                  | 1.699(3) <sup>a</sup> | 1.795(3)          |
| N(2)-C(1)                  | 1.356(4) <sup>a</sup> | 1.303(4)          |
| N(2)-N(3)                  | 1.370(4) <sup>a</sup> | 1.397(4)          |
| N(3)-C(2)                  | 1.279(4) <sup>a</sup> | 1.295(4)          |
| C(1)-N(1)                  | 1.327(4) <sup>a</sup> | 1.340(5)          |
| N(1)-C(11)                 | 1.465(4) <sup>a</sup> | 1.461(5)          |
| N(3)-Ru(1)-S(1)            |                       | 79.10(9)          |
| N(3)-Ru(1)-X               |                       | 83.43(9)          |
| S(1)-Ru(1)-X               |                       | 81.75(3)          |
| S(1)-Ru(1)-Cc <sup>b</sup> |                       | 131.25(3)         |
| N(3)-Ru(1)-Cc <sup>b</sup> |                       | 129.51(9)         |
| X-Ru(1)-Cc <sup>b</sup>    |                       | 132.48(3)         |
| C(2)-N(3)-Ru(1)            |                       | 121.4(3)          |
| N(2)-N(3)-Ru(1)            |                       | 120.9(2)          |
| C(1)-S(1)-Ru(1)            |                       | 95.04(13)         |
| C(2)-N(3)-N(2)             | 118.5(3) <sup>a</sup> | 117.4(3)          |
| N(3)-C(2)-C(3)             | 120.0(4) <sup>a</sup> | 131.6(4)          |
| N(1)-C(1)-N(2)             | 115.5(3) <sup>a</sup> | 121.6(3)          |
| N(1)-C(1)-S(1)             | 124.3(2) <sup>a</sup> | 114.8(3)          |
| N(2)-C(1)-S(1)             | 120.1(2) <sup>a</sup> | 123.5(3)          |

a) The data are the average of those observed in the two molecules present in the asymmetric unit.

b) Centroid defined for the averages of the six-membered ring of p-cymene ligand.

c) Average distance of the six Ru-C of p-cymene ligand.

d) Symmetry transformations used to generate equivalent atoms: -x+1,-y+1,-z

| Table S3. Main intermolecular interactions observed in the crystal structures (Å and °). |           |          |            |           |
|------------------------------------------------------------------------------------------|-----------|----------|------------|-----------|
| D-H...A                                                                                  | d(D-H)    | d(H...A) | d(D...A)   | <(DHA)    |
| <b>HL<sup>1</sup></b>                                                                    |           |          |            |           |
| O(2)-H(2)...O(1) <sup>#1</sup>                                                           | 0.80(3)   | 2.12(3)  | 2.7946(15) | 141(2)    |
| O(2)-H(2)...O(3)                                                                         | 0.80(3)   | 2.25(2)  | 2.6960(14) | 116(2)    |
| N(2)-H(1N2)...S(1) <sup>#2</sup>                                                         | 0.89(2)   | 2.60(2)  | 3.4104(12) | 151.2(17) |
| <b>HL<sup>2</sup></b>                                                                    |           |          |            |           |
| N(1A)-H(1A)...N(3A)                                                                      | 0.85(5)   | 2.11(5)  | 2.557(5)   | 112(4)    |
| N(2A)-H(2A1)...S(1B) <sup>#4</sup>                                                       | 0.83(5)   | 2.68(5)  | 3.456(4)   | 155(5)    |
| O(2A)-H(2A2)...S(1A) <sup>#3</sup>                                                       | 0.81(5)   | 2.48(5)  | 3.285(4)   | 175(4)    |
| N(1B)-H(1B)...N(3B)                                                                      | 0.88(4)   | 2.15(4)  | 2.586(5)   | 110(3)    |
| N(2B)-H(2B1)...S(1A) <sup>#4</sup>                                                       | 0.72(5)   | 2.77(5)  | 3.432(4)   | 155(5)    |
| O(2B)-H(2B2)...S(1B) <sup>#3</sup>                                                       | 0.82(6)   | 2.45(6)  | 3.261(4)   | 173(5)    |
| <b>1(Cl).CH<sub>3</sub>OH</b>                                                            |           |          |            |           |
| N(1)-H(1)...Cl(2)                                                                        | 0.77(2)   | 2.40(2)  | 3.1398(15) | 160(2)    |
| N(2)-H(2N2)...Cl(2)                                                                      | 0.84(2)   | 2.47(2)  | 3.2317(15) | 152(2)    |
| O(2)-H(2)...O(1S)                                                                        | 0.81(3)   | 1.86(3)  | 2.654(2)   | 171(3)    |
| O(1S)-H(1S)...Cl(2) <sup>#5</sup>                                                        | 0.83(3)   | 2.25(3)  | 3.0756(16) | 174(3)    |
| <b>1(Cl).<sup>4</sup>/3H<sub>2</sub>O</b>                                                |           |          |            |           |
| N(1)-H(1)...Cl(2)                                                                        | 0.85(4)   | 2.32(4)  | 3.116(4)   | 158(3)    |
| C(4)-H(4)...Cl(2) <sup>#6</sup>                                                          | 0.95      | 2.83     | 3.635(3)   | 143.0     |
| O(2)-H(6)...Cl(1) <sup>#7</sup>                                                          | 0.93(4)   | 2.45(4)  | 3.197(2)   | 138(3)    |
| O(2)-H(6)...O(3)                                                                         | 0.93(4)   | 2.17(4)  | 2.683(3)   | 114(3)    |
| N(2)-H(9)...Cl(2)                                                                        | 0.82(4)   | 2.43(4)  | 3.186(3)   | 153(3)    |
| C(11)-H(11D)...S(1)                                                                      | 0.99      | 2.54     | 3.066(4)   | 113.1     |
| C(14)-H(14)...Cl(1) <sup>#8</sup>                                                        | 0.95      | 2.91     | 3.783(3)   | 153.2     |
| O(1W)-H(11W)...O(1W) <sup>#6</sup>                                                       | 1.000(2)  | 2.55(10) | 3.138(11)  | 117(8)    |
| O(1W)-H(12W)...Cl(2)                                                                     | 1.000(2)  | 2.51(5)  | 3.238(9)   | 129(5)    |
| <b>1(TfO).2(CH<sub>3</sub>OH)</b>                                                        |           |          |            |           |
| N(1A)-H(1A)...O(2A) <sup>#9</sup>                                                        | 0.80(7)   | 2.50(7)  | 3.071(6)   | 129(6)    |
| N(1A)-H(1A)...O(3A) <sup>#9</sup>                                                        | 0.80(7)   | 2.25(7)  | 3.031(6)   | 165(7)    |
| N(2A)-H(2A)...O(2A) <sup>#9</sup>                                                        | 0.88      | 2.00     | 2.816(6)   | 152.8     |
| O(2A)-H(2A1)...O(2M)                                                                     | 0.73(7)   | 1.85(7)  | 2.570(6)   | 171(8)    |
| N(1B)-H(1B)...O(2B) <sup>#10</sup>                                                       | 0.79(6)   | 2.38(6)  | 3.047(6)   | 143(5)    |
| N(1B)-H(1B)...O(3B) <sup>#110</sup>                                                      | 0.79(6)   | 2.39(6)  | 3.103(6)   | 150(5)    |
| N(2B)-H(2B)...O(2B) <sup>#9</sup>                                                        | 0.88      | 2.04     | 2.858(6)   | 153.5     |
| O(2B)-H(2B1)...O(1M)                                                                     | 0.72(6)   | 1.86(6)  | 2.577(7)   | 169(7)    |
| O(1M)-H(1M)...S(1T)                                                                      | 0.84      | 3.02     | 3.824(5)   | 161.3     |
| O(1M)-H(1M)...O(1T3)                                                                     | 0.84      | 1.87     | 2.706(7)   | 174.4     |
| O(2M)-H(2M)...O(2T3)                                                                     | 0.77(9)   | 1.93(9)  | 2.696(7)   | 173(10)   |
| O(3M)-H(3M)...O(4M)                                                                      | 0.84      | 2.14     | 2.882(14)  | 147.7     |
| O(4M)-H(4M)...O(2T2)                                                                     | 0.857(19) | 2.20(9)  | 2.879(10)  | 136(11)   |



| Table S3. (cont.)                                                                                                                                                                                                                                     |      |      |           |       |
|-------------------------------------------------------------------------------------------------------------------------------------------------------------------------------------------------------------------------------------------------------|------|------|-----------|-------|
| <b>[Ru<sub>2</sub>(p-Cm)<sub>2</sub>(μ-L<sup>2</sup>)<sub>2</sub>][SO<sub>3</sub>CF<sub>3</sub>]</b>                                                                                                                                                  |      |      |           |       |
| N(1)-H(1A)...O(1T3 <sup>a</sup> ) <sup>#11</sup>                                                                                                                                                                                                      | 0.86 | 2.07 | 2.839(11) | 148.1 |
| N(1)-H(1A)...O(2T3 <sup>b</sup> ) <sup>#11</sup>                                                                                                                                                                                                      | 0.86 | 2.30 | 3.02(2)   | 141.5 |
| O(2)-H(2B)...O(1T2 <sup>a</sup> )                                                                                                                                                                                                                     | 0.82 | 2.09 | 2.868(12) | 158.3 |
| O(2)-H(2B)...O(2T1 <sup>b</sup> )                                                                                                                                                                                                                     | 0.82 | 1.88 | 2.648(9)  | 156.0 |
| Symmetry transformations used to generate equivalent atoms: #1 x+1,-y+3/2, z-1/2; #2 -x+1,-y+1,-z; #3 x-1,y-1,z; #4 -x+1,-y+1,-z+1; #5 -x+1,-y+1,-z; #6 x-y,x-1,-z+1; #7 x-y,x-1,-z; #8 x,y,z+1; #9 -x+1,-y+1,-z; #10 -x+2,-y+1,-z+1; #11 x-1,y-1,z-1 |      |      |           |       |

### <sup>1</sup>H-NMR spectra

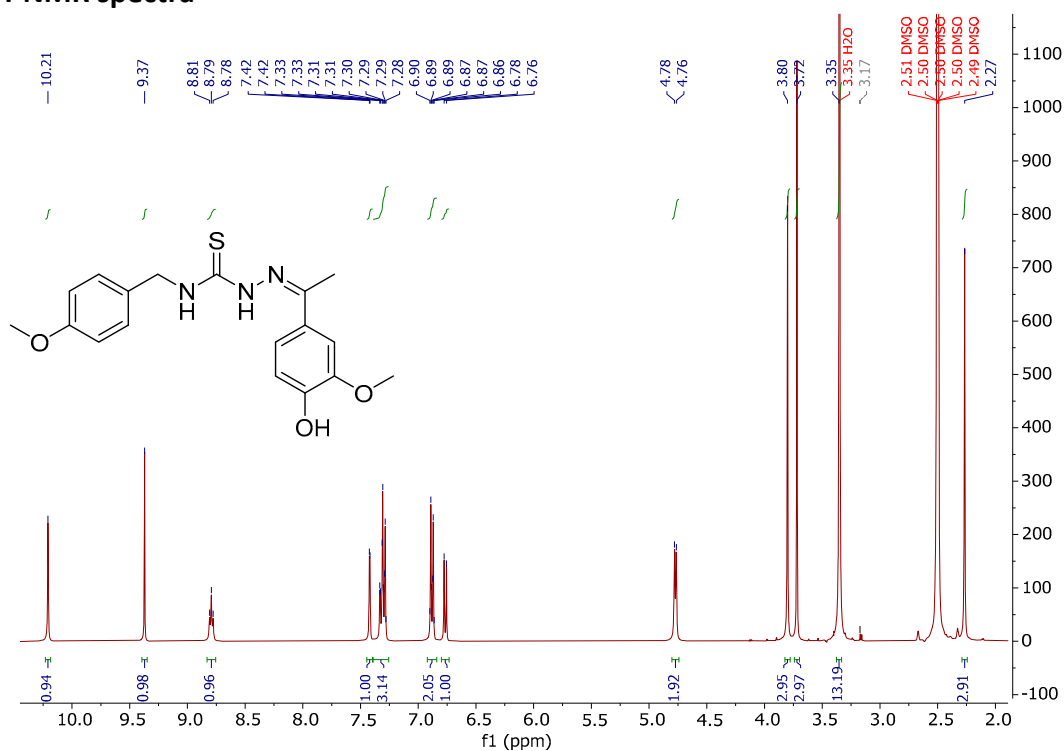

Figure S1:  $^1\text{H}$  NMR spectrum of ligand HL<sup>1</sup>

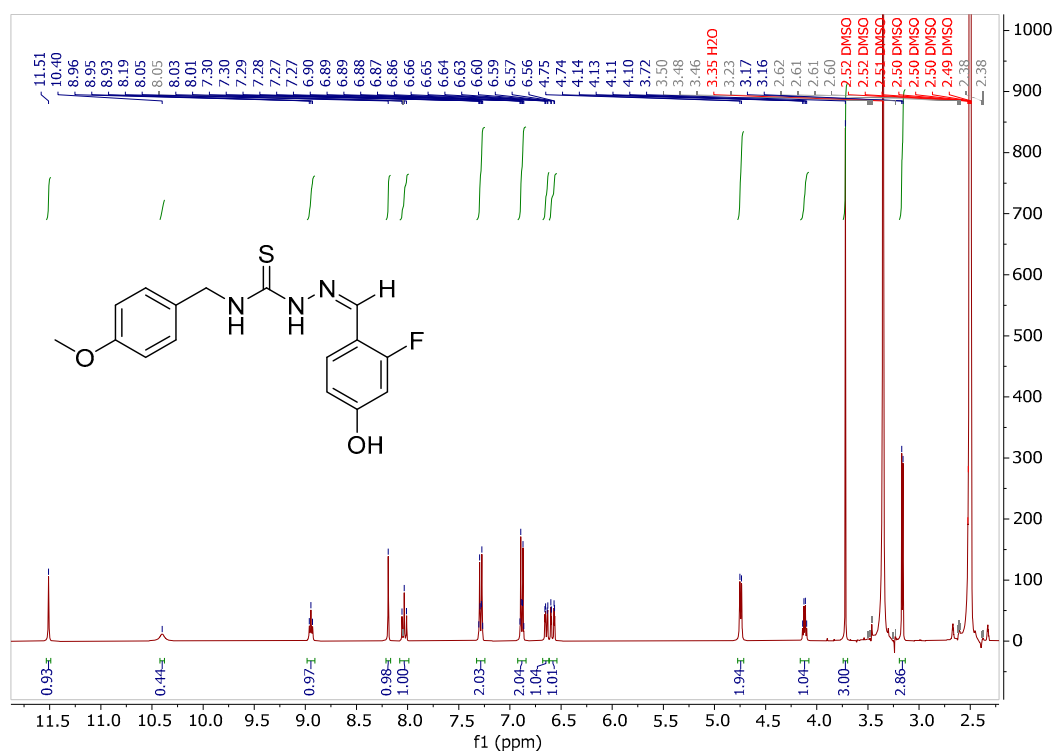

Figure S2:  $^1\text{H}$  NMR spectrum of ligand HL<sup>2</sup>

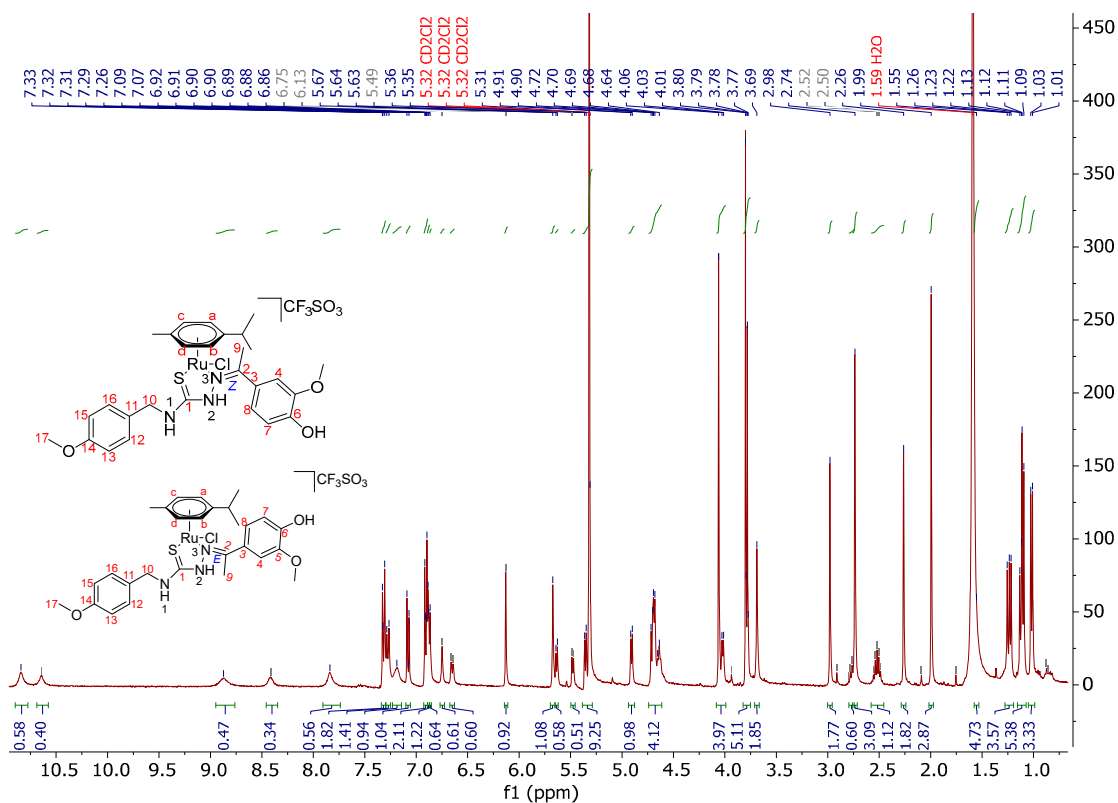

Figure S3:  $^1\text{H}$  NMR spectrum of complex 1(TfO)

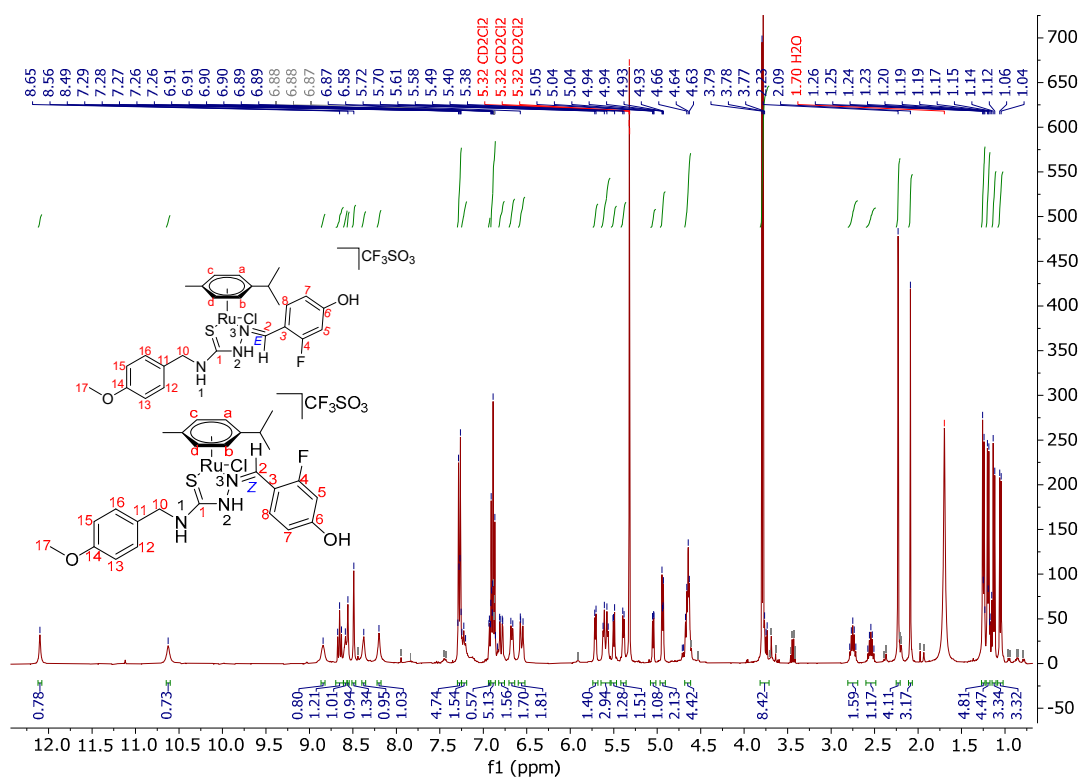

Figure S4:  $^1\text{H}$  NMR spectrum of complex 2(TfO)

### <sup>13</sup>C-NMR spectra

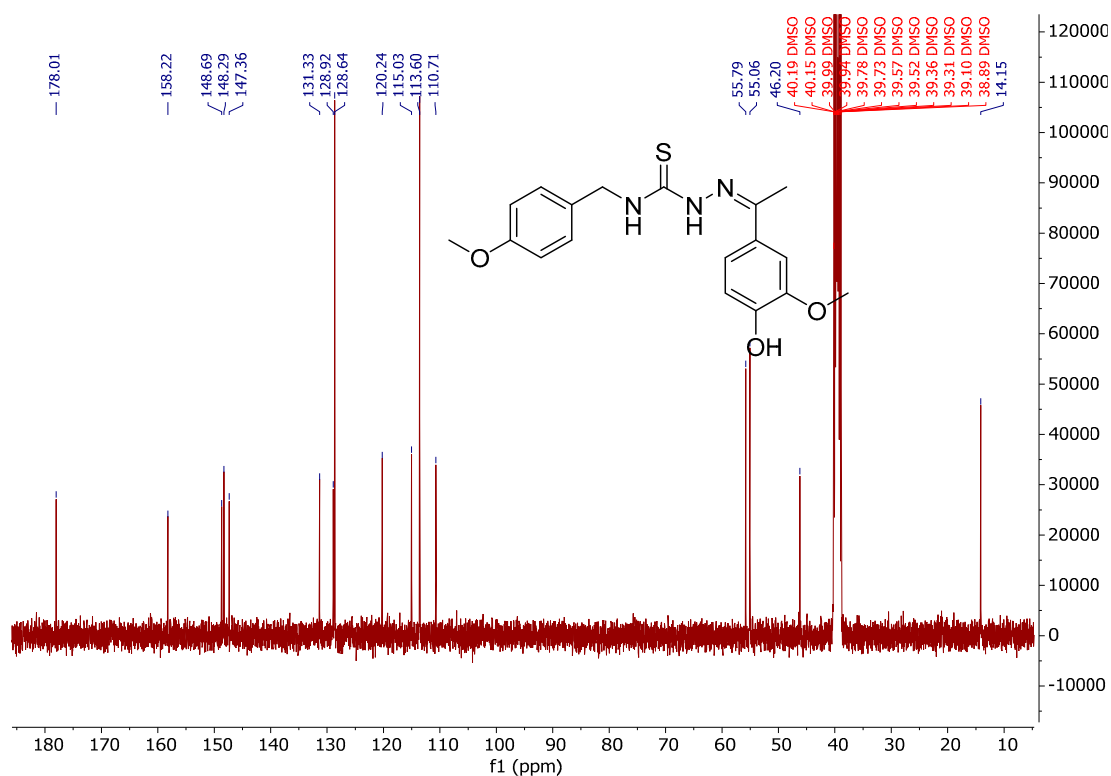

Figure S5: <sup>13</sup>C NMR spectrum of ligand HL<sup>1</sup>

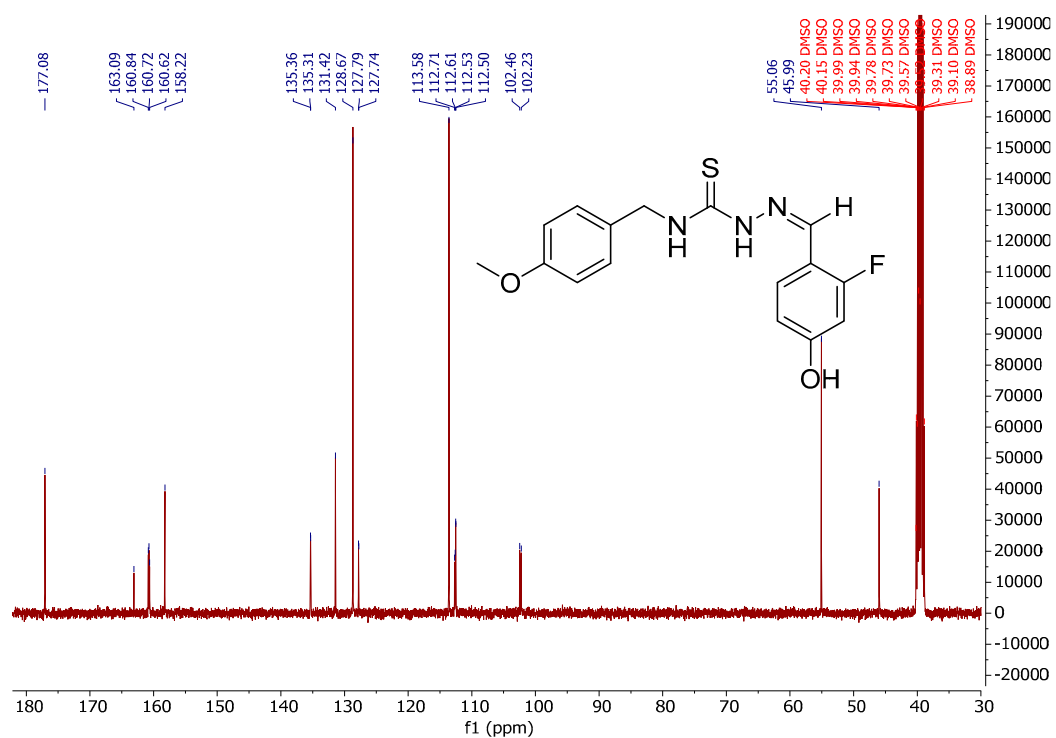

Figure S6: <sup>13</sup>C NMR spectrum of ligand HL<sup>2</sup>

## NOESY spectra

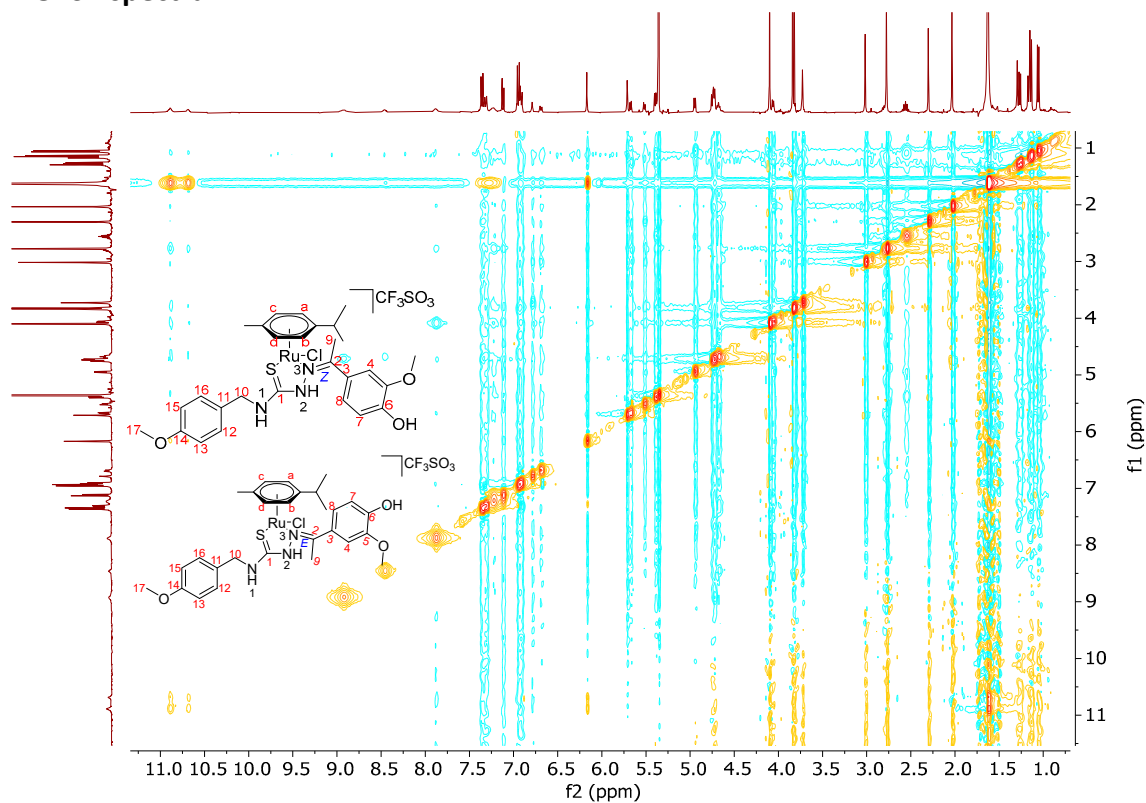

Figure S7: NOESY spectrum of complex 1(OTf)

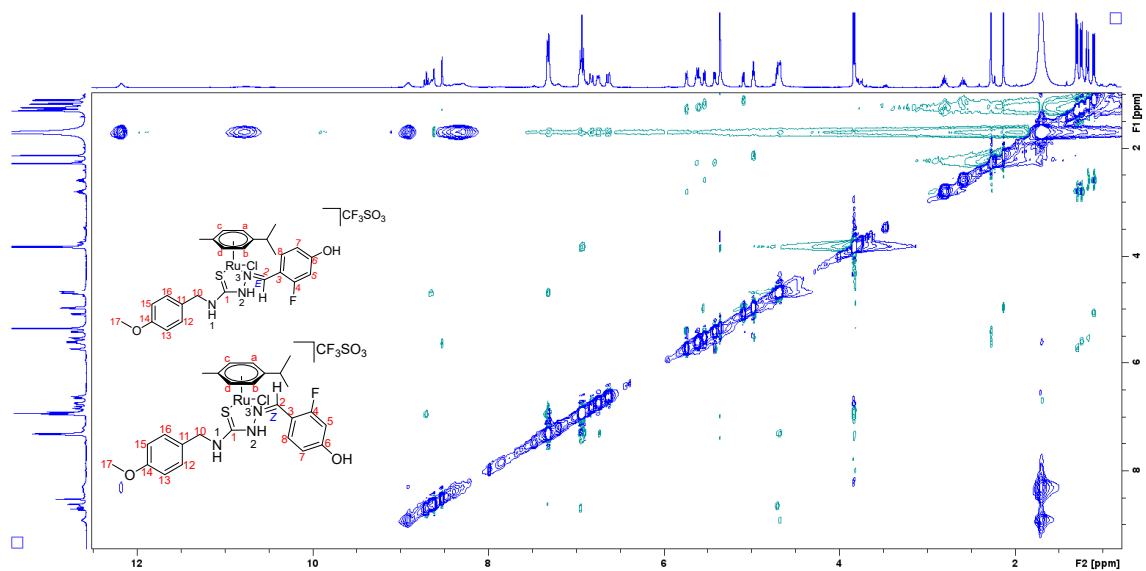

Figure S8: NOESY spectrum of complex 2(OTf)

## ESI-Mass spectra

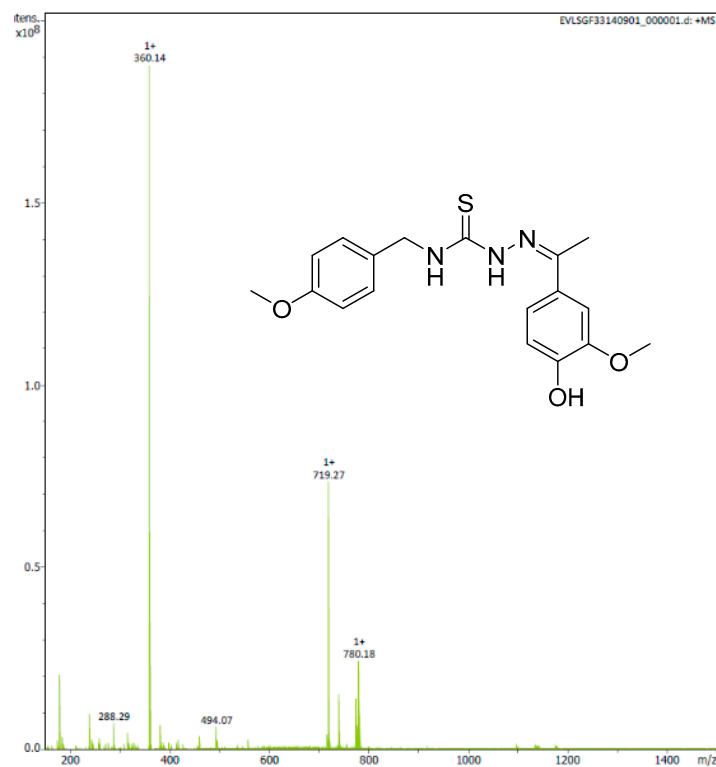

Figure S9: ESI Mass spectra of ligand HL<sup>1</sup>

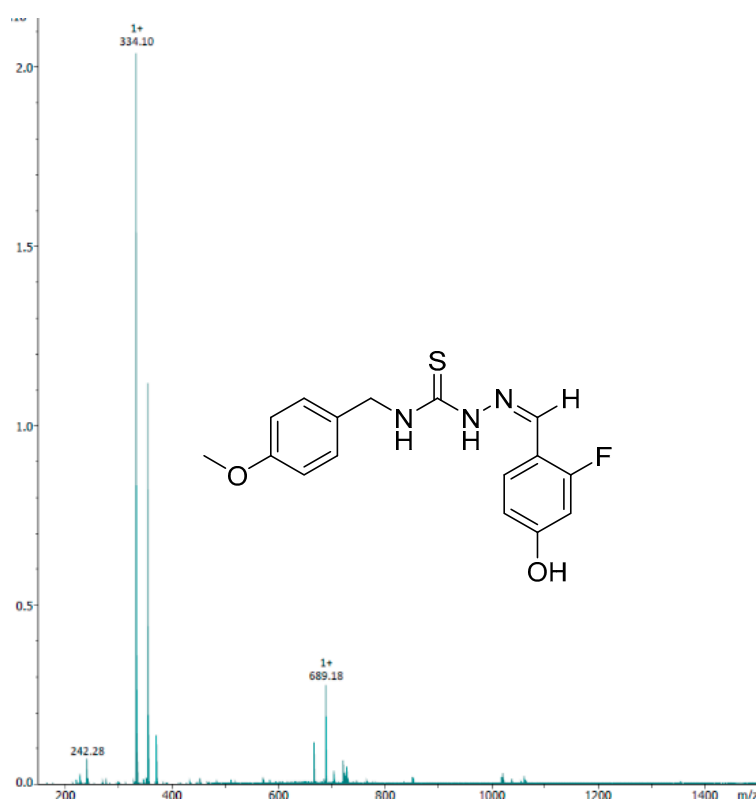

Figure S10: ESI Mass spectra of ligand HL<sup>2</sup>

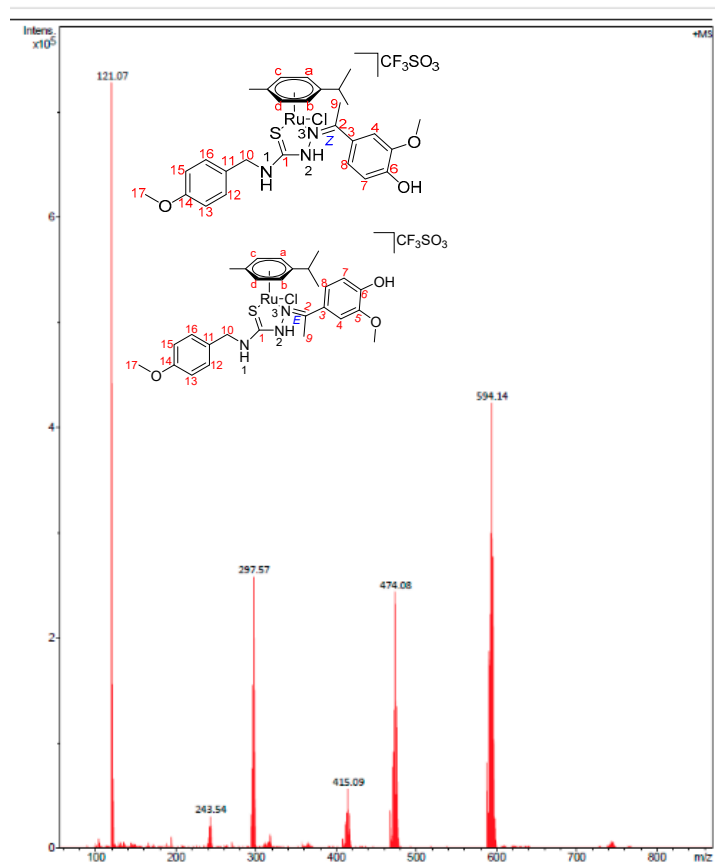

Figure S11: ESI Mass spectra of complex 1(TfO)

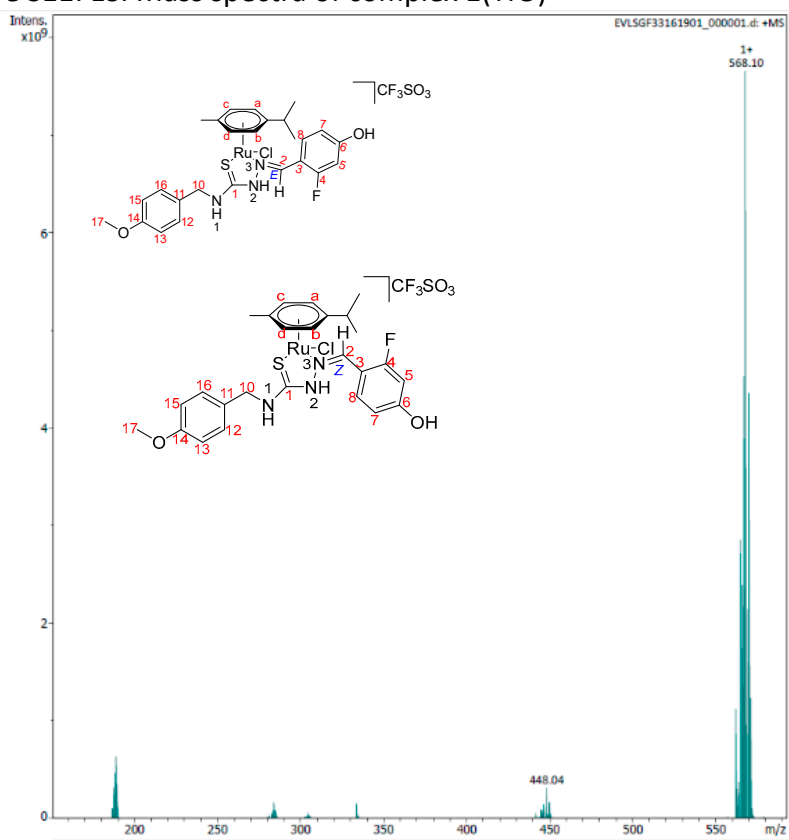

Figure S12: ESI Mass spectra of complex 2(TfO)

## Infrared spectra

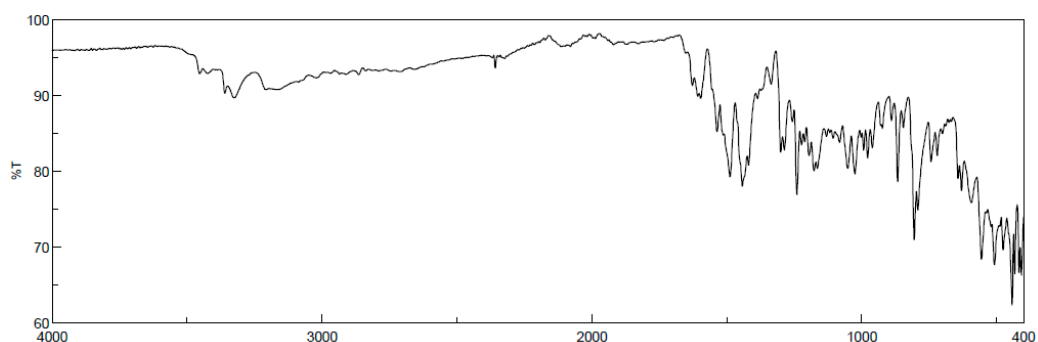

Figure S13: IR spectrum of ligand HL<sup>1</sup>

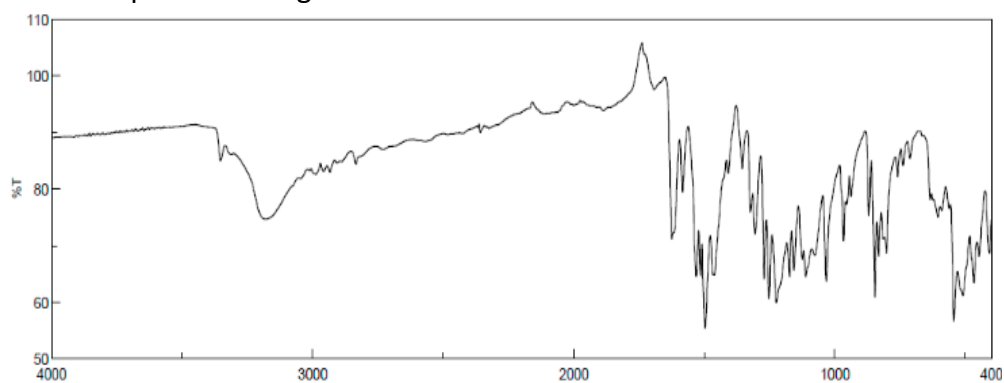

Figure S14: IR spectrum of ligand HL<sup>2</sup>

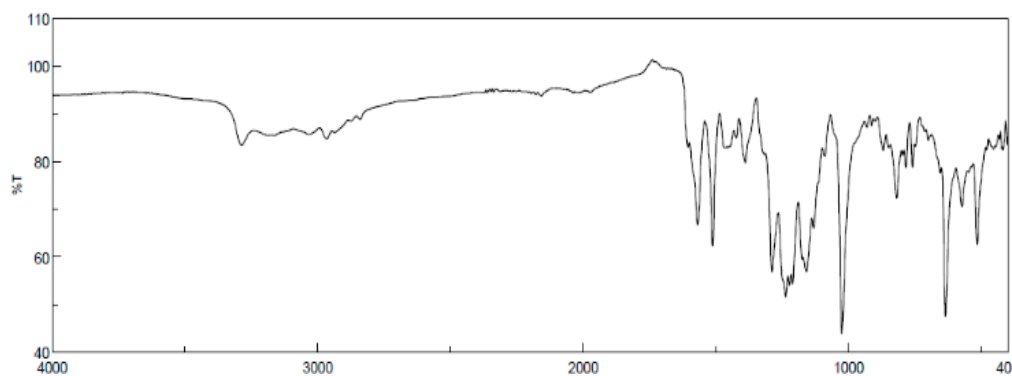

Figure S15: IR spectrum of complex 1(TfO)

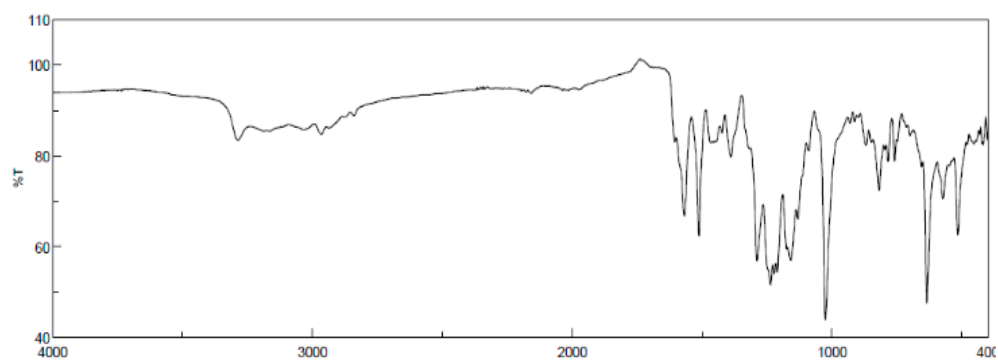

Figure S16: IR spectrum of complex 2(TfO)



## Cyclic voltammetry

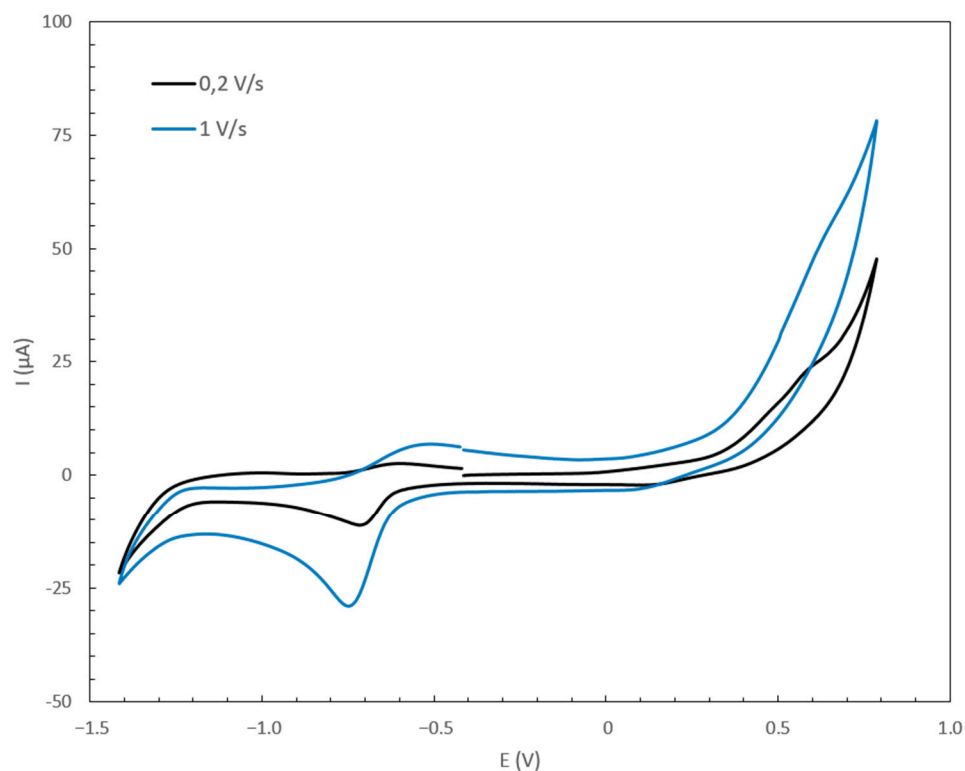

Figure S17: Cyclic voltammetry (CV) and square wave voltammetry (SWV) data of complex 1(TfO)

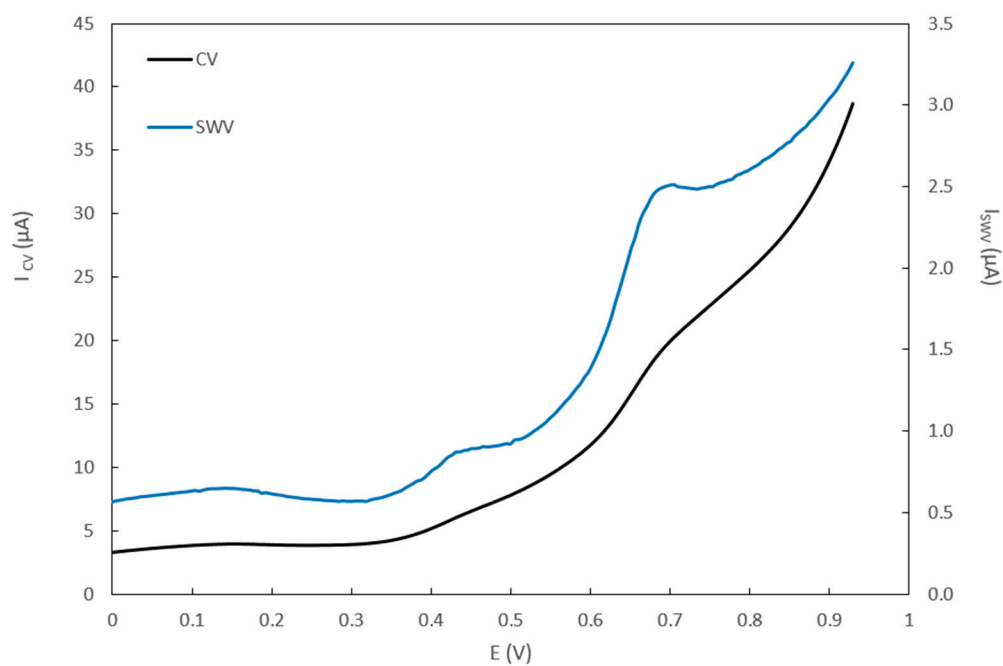

Figure S18: Cyclic voltammetry (CV) and square wave voltammetry (SWV) data of complex 2(TfO)

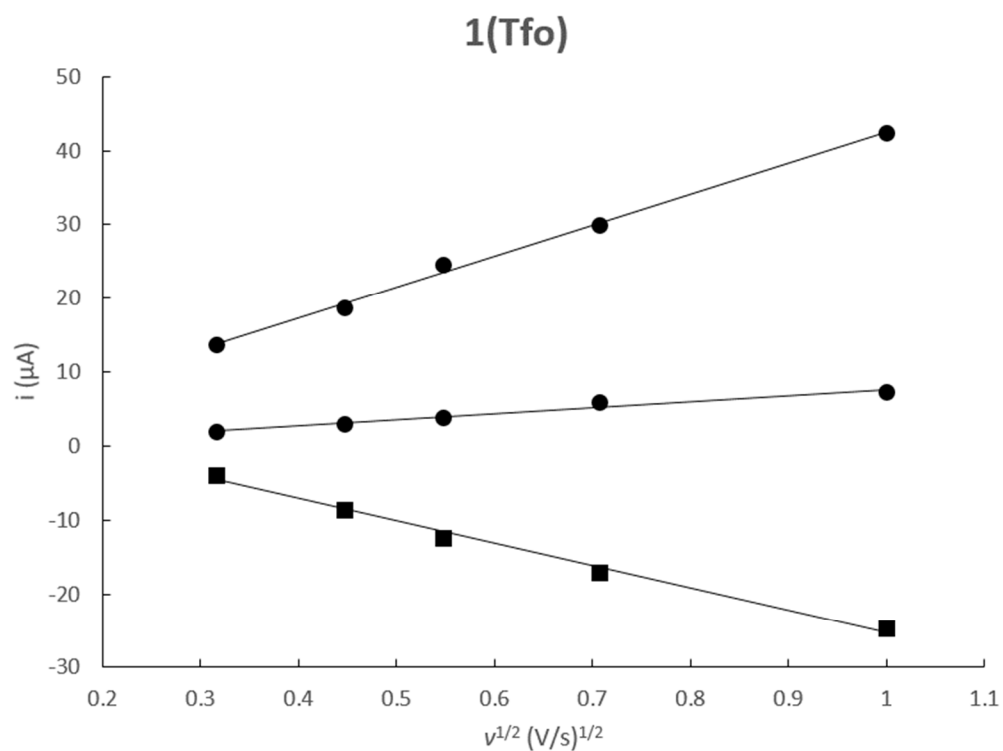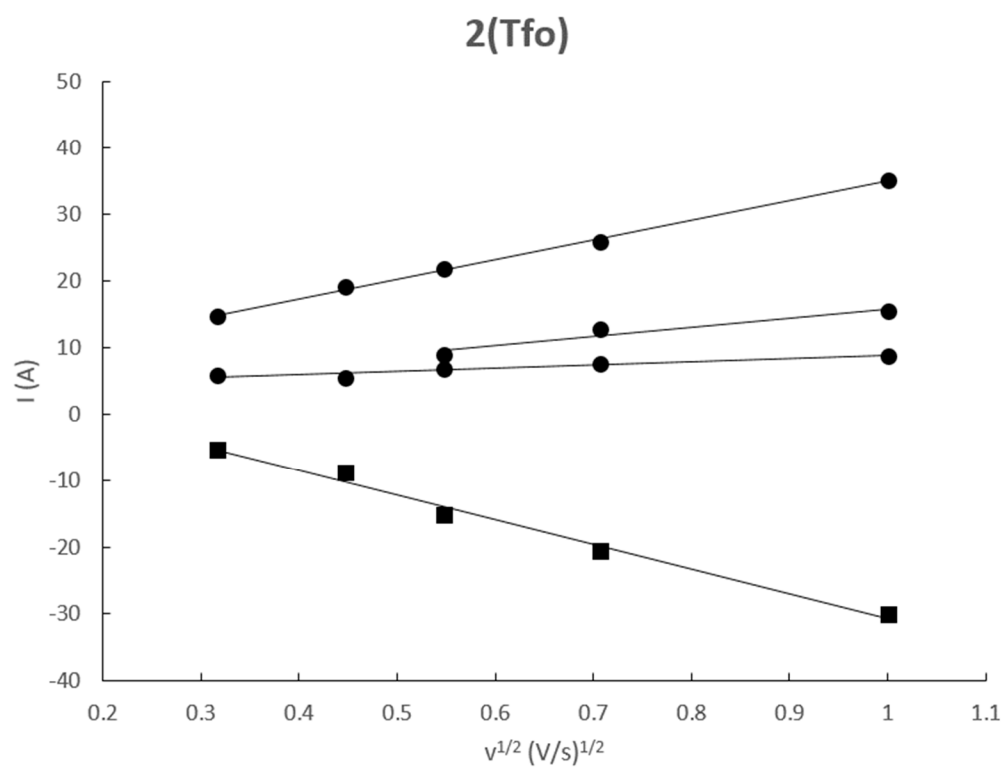

Figure S19: X:  $I_{pa}$  (●) and  $I_{pc}$  (■) of redox waves for complexes 1(TfO) (top) and 2(TfO) (bottom) vs square root of scan rate.
